# Supplementary material for: Readability and Quality of Online Information on Osteoarthritis: An Objective Analysis With Historic Comparison
Source: PubMed Central journal article supplement (PMC6754692; doi:10.2196/12855), 2019-09-16

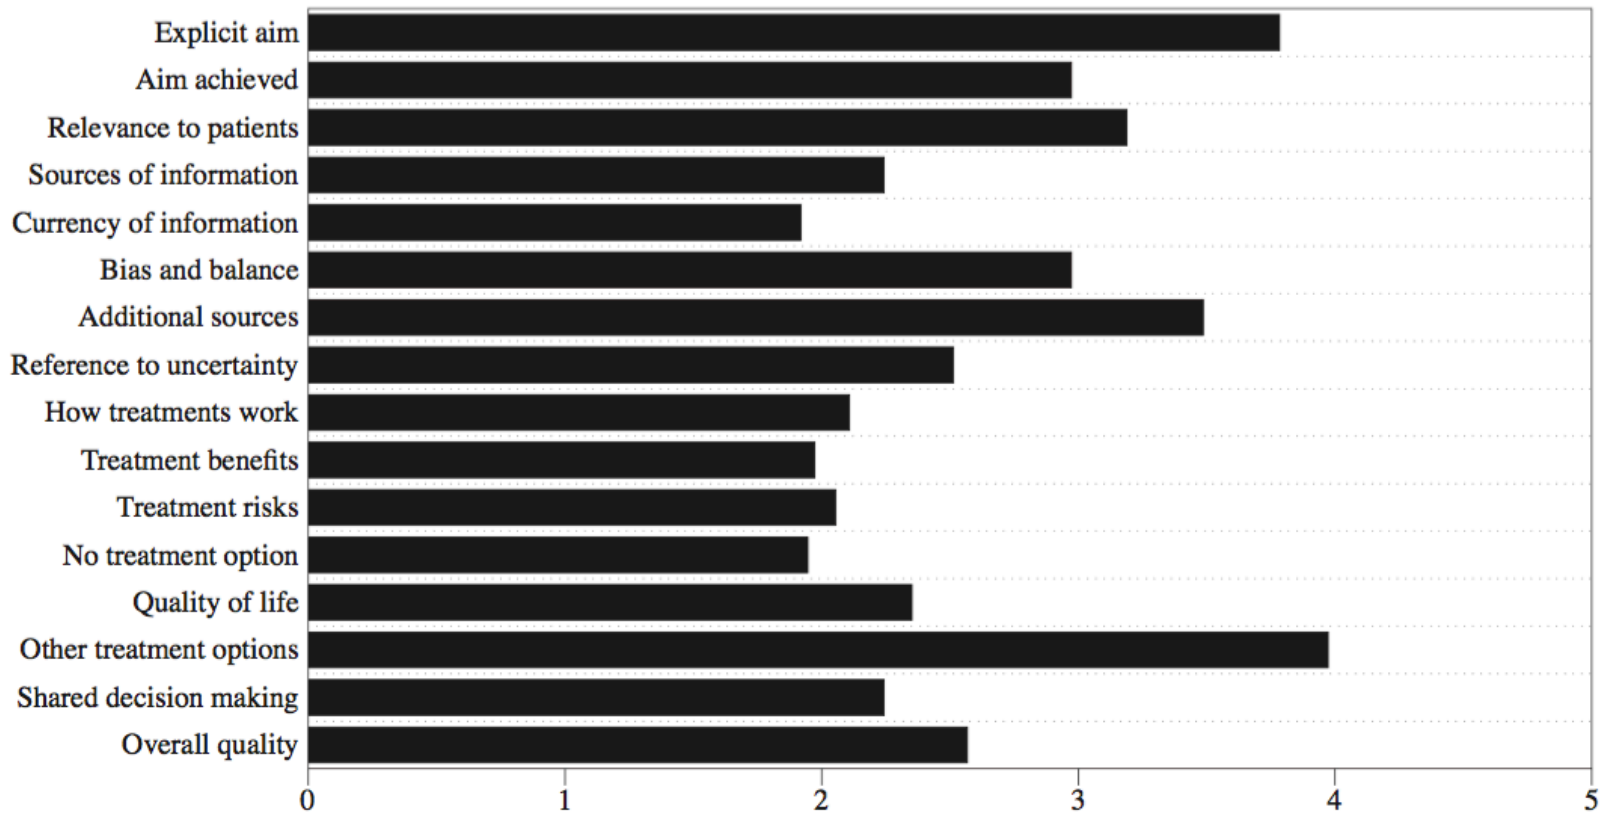

Supplement: ijmr_v8i3e12855_app1.pdf [file ijmr_v8i3e12855_app1.pdf]
